# Supplementary material for: Linking Neuroinflammation and Extracellular Free Water in HIV Infection: A Longitudinal Study
Source: Research Square preprint supplement (doi:10.21203/rs.3.rs-121836/v1), 2020-12-08
Supplement: Supplementary file 1 [file 0bb17011c408f0520173a18b.docx]

***Table S2: Cohort and long-term cART treatment effects in free water (FW) based on the long-term model (LTM) for 25 brain structures.***

| **Structure** | **ß ×10-3** | | | |  | **p-value** | | |
| --- | --- | --- | --- | --- | --- | --- | --- | --- |
| **Cohort** | **Visit** | **Age** | **Cohort.Visit** | **Cohort** | **Visit** | **Age** | **Cohort.Visit** |  |
| FMaj | -5.80 | 1.60 | 0.00 | 3.30 | 0.215 | 0.080 | 0.911 | **0.038** |
| FMin | 0.20 | 1.00 | 0.20 | -0.80 | 0.919 | 0.067 | **0.025** | 0.426 |
| GCC | -4.20 | 4.90 | 0.50 | 1.70 | 0.468 | **0.003** | **0.014** | 0.533 |
| SCC | 0.10 | 2.10 | 0.30 | -0.40 | 0.973 | 0.054 | 0.071 | 0.820 |
| TH | 3.00 | 7.90 | 1.30 | -0.20 | 0.628 | **<0.001** | **<0.001** | 0.952 |
| CN | 9.50 | 9.00 | 2.30 | -0.70 | 0.352 | **<0.001** | **<0.001** | 0.833 |
| PUT | 0.50 | 0.00 | 0.10 | 0.00 | 0.591 | 0.817 | **<0.001** | 0.899 |
| GP | -0.70 | -0.10 | 0.20 | -0.10 | 0.622 | 0.894 | **<0.001** | 0.917 |
| Amyg | 7.60 | 16.60 | 1.10 | -0.80 | 0.231 | **<0.001** | **<0.001** | 0.853 |
| AccN | 0.00 | -1.00 | 0.50 | 3.90 | 0.999 | 0.373 | **<0.001** | **0.034** |
| ATR | 1.00 | 0.30 | 0.40 | -0.50 | 0.529 | 0.423 | **<0.001** | 0.432 |
| CST | 1.50 | 1.30 | 0.20 | -0.70 | 0.413 | **0.001** | **0.015** | 0.273 |
| SLF | 1.80 | 0.80 | 0.40 | -1.20 | 0.296 | **0.009** | **<0.001** | **0.029** |
| ALIC | 0.40 | 0.50 | 0.10 | -0.30 | 0.315 | **0.001** | **<0.001** | 0.349 |
| PLIC | 0.20 | 0.20 | 0.00 | 0.00 | 0.317 | **0.008** | **0.044** | 0.721 |
| PTR | -2.90 | 2.10 | 0.10 | 1.90 | 0.375 | **0.010** | 0.659 | 0.180 |
| EC | 0.70 | 0.50 | 0.10 | -0.30 | 0.198 | **0.002** | **<0.001** | 0.233 |
| HC | 16.60 | 5.50 | 1.50 | 0.40 | 0.077 | **<0.001** | **<0.001** | 0.862 |
| CP | 9.60 | 3.90 | 0.20 | -4.90 | 0.086 | **0.036** | 0.220 | 0.119 |
| ACR | 0.00 | 0.10 | 0.00 | 0.10 | 0.889 | **0.045** | **0.006** | 0.593 |
| SCR | -0.10 | 0.00 | 0.00 | 0.00 | 0.772 | 0.072 | **0.045** | 0.991 |
| RLIC | 0.90 | 1.10 | 0.10 | -0.10 | 0.295 | **<0.001** | **0.022** | 0.836 |
| SFOF | 0.70 | 0.30 | 0.10 | -0.40 | 0.278 | **0.022** | **0.003** | 0.110 |
| CG | 3.10 | 1.50 | 0.20 | -1.50 | **0.015** | **<0.001** | **0.001** | **0.029** |
| FX | 23.40 | 2.70 | 3.90 | -8.60 | 0.230 | 0.603 | **<0.001** | 0.329 |

GP: Globus Pallidus; PUT: Putamen; CN: Caudate Nucleus; TH: Thalamus; Hippo: Hippocampus; Amyg: Amygdala; AccN: Accumbens Nucleus; SCC: Splenium of Corpus Callosum; GCC: Genu of Corpus Callosum; CST: Corticospinal Tract; ATR: Anterior Thalamic Radiation; PTR: Posterior Thalamic Radiation; ALIC: Anterior Limbic Internal Capsule; PLIC: Posterior Limbic Internal Capsule; EC: External Capsule; SLF: Superior Longitudinal Fasciculus; FMaj: Forceps Major; FMin: Forceps Minor; CP: Cerebral Peduncle; ACR: Anterior Corona Radiata; SCR: Superior Corona Radiata; RLIC: Retrolenticular part of Internal Capsule; SFOF: Superior Fronto-Occipital Fasciculus; CG: Cingulum and FX: Fornix. FW values were averaged over bilateral ROIs (except some WM tracts) for each participant.
